# Supplementary material
Source: PubMed Central journal article supplement (PMC10131251)

# Supplementary Material

## Tolcapone Treatment for Cognitive and Behavioral Symptoms in Behavioral Variant Frontotemporal Dementia: A Placebo-Controlled Crossover Study

**Supplementary Figure 1.** Scores on the Repeatable Battery for the Assessment of Neuropsychological Status (RBANS) by subdomain by treatment phase. Error bars represent 95% confidence intervals.

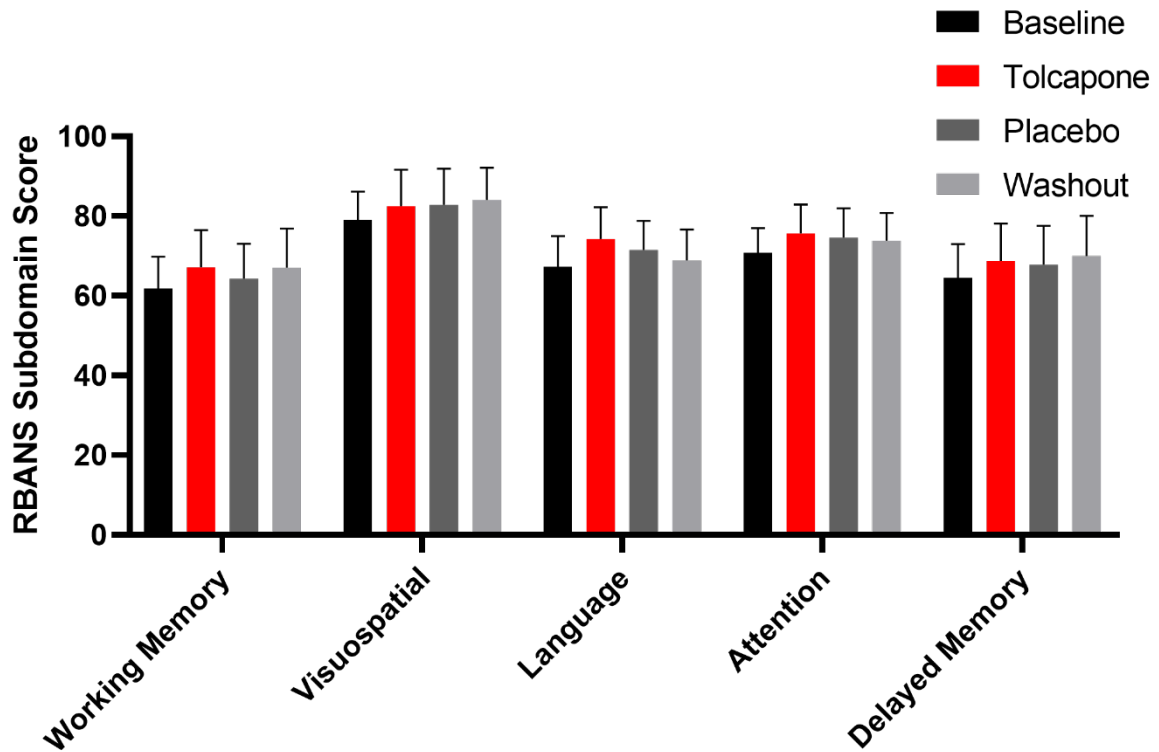

**Supplementary Figure 2.** Scores on the Neuropsychiatric Inventory-Questionnaire (NPI-Q) by subdomain by treatment phase. Error bars represent 95% confidence intervals.

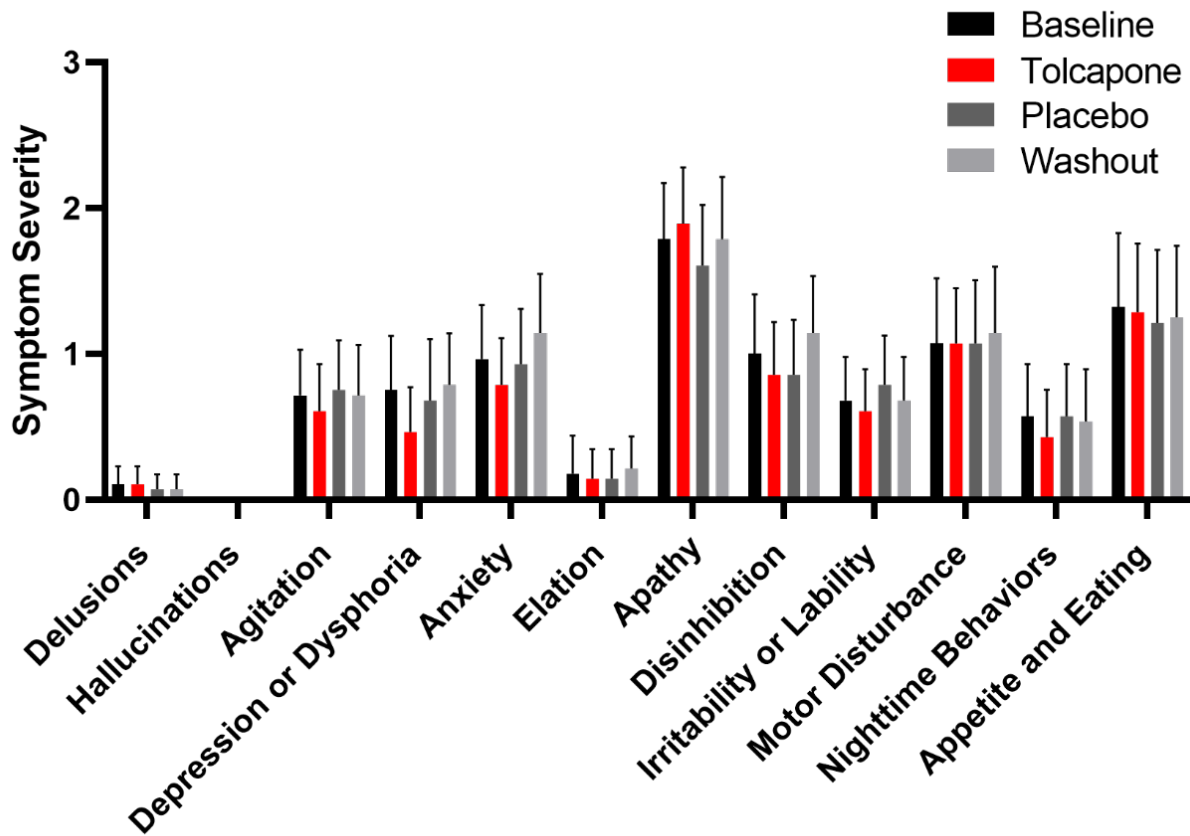

Supplement: NIHMS1890177-supplement-supplementary_material.pdf [file NIHMS1890177-supplement-supplementary_material.pdf]
